# Supplementary material
Source: PubMed Central journal article supplement (PMC3875141)

## SUPPLEMENTAL MATERIAL

### Supplemental Figure Captions

- S1.** EDD product assignments for CS-A dp4-10.
- S2.** Proposed pathway for the electron-based activation of multiply charged anions.
- S3.** Assigned product ions for the EID of the  $[M-H]^{1-}$  precursor ion for the CS-A/DS epimer pair.
- S4.** The product ions in the previous stereo-specific region in the EID mass spectrum. (Based on accurate mass, the  $^{0,2}A_3$  ion is not observed.)
- S5.** Assigned product ions for the EDD of the  $[M-3H+1Na]^{2-}$  precursor ion for the CS-A/DS epimer pair.
- S6.** Assigned product ions for the EDD of the  $[M-4H+2Na]^{2-}$  precursor ion for the CS-A/DS epimer pair.

## Supplemental Figures

S1.

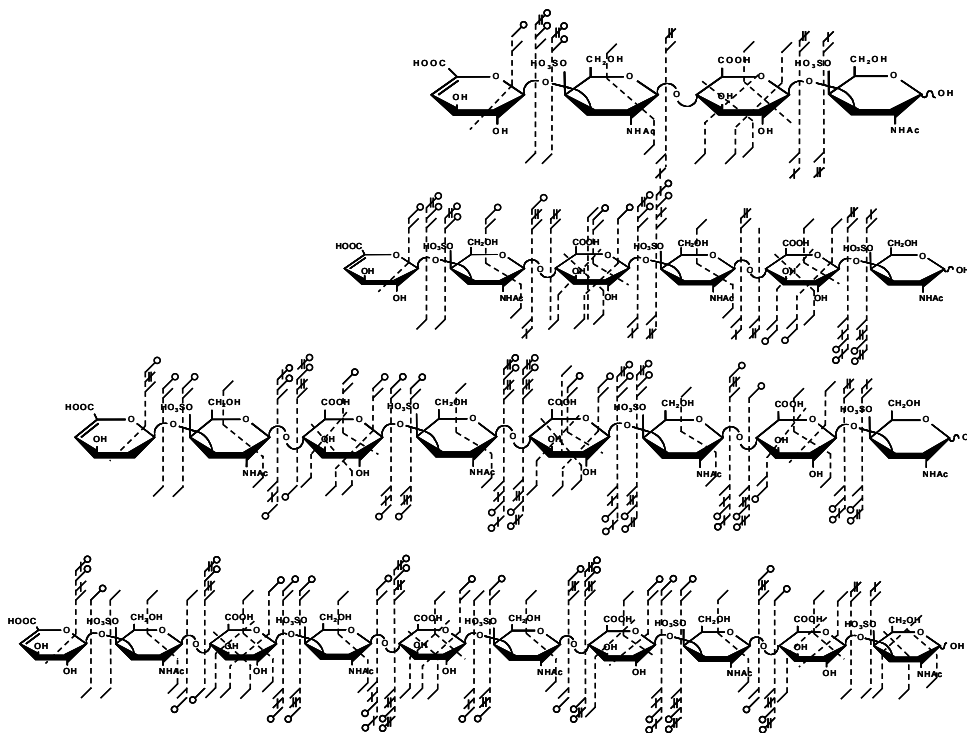

S2.

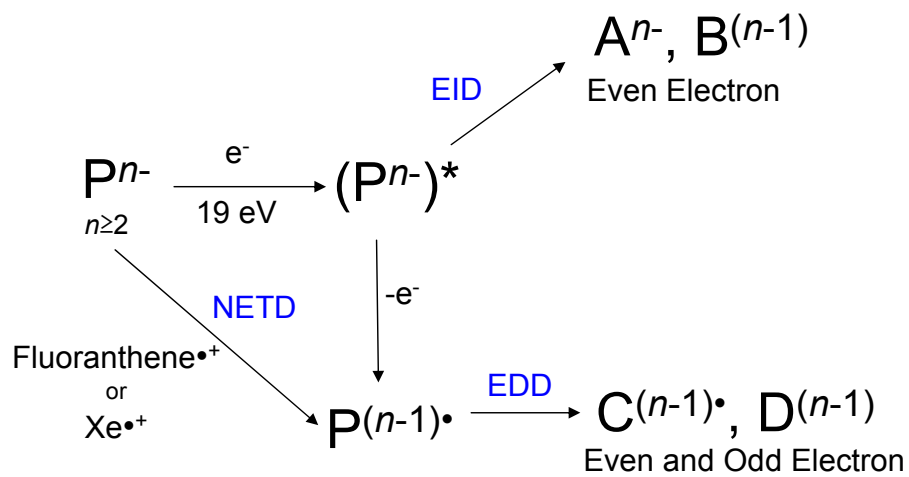

S3.

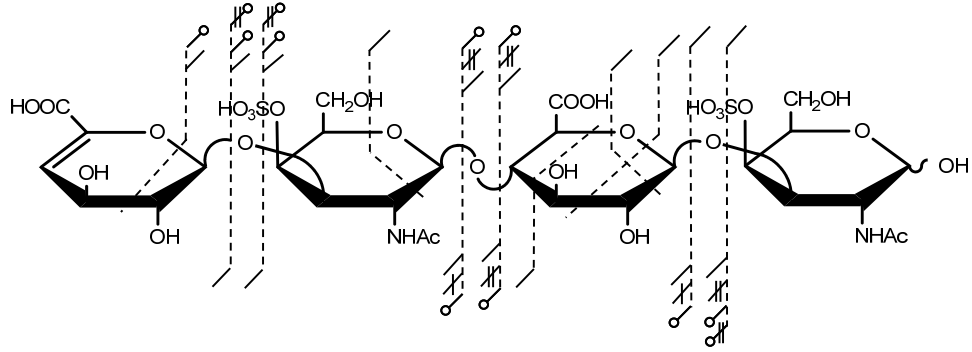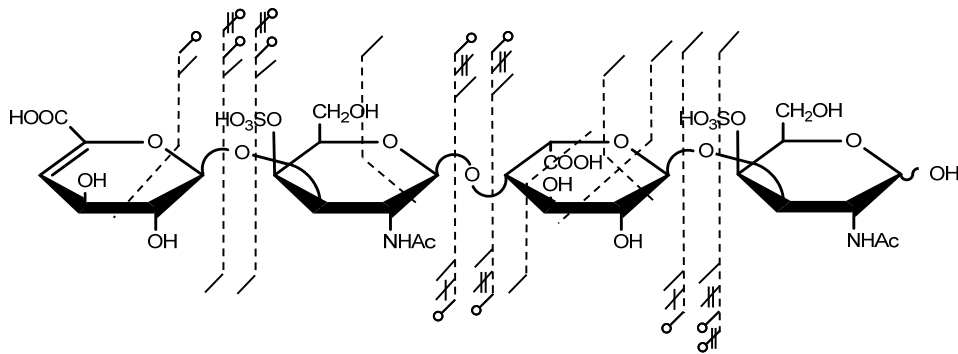

S4.

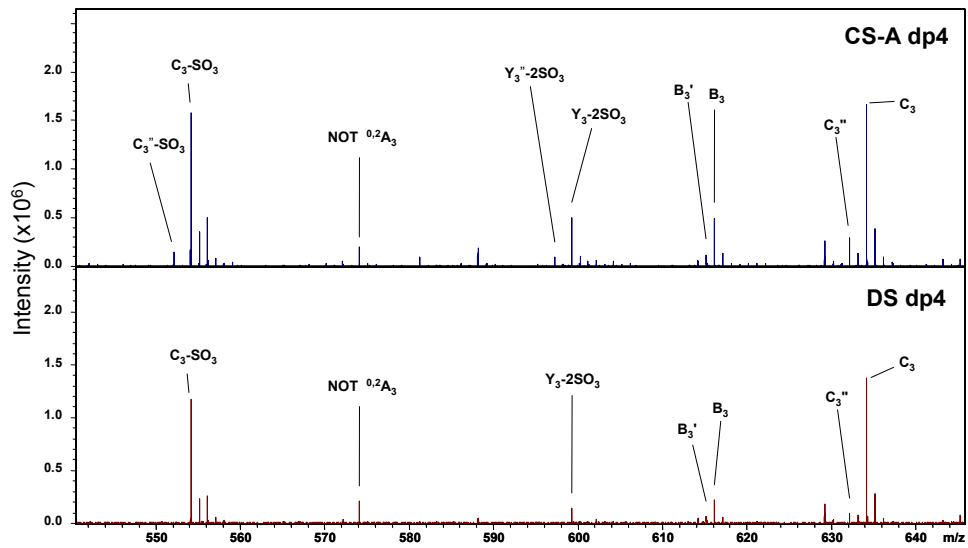

S5.

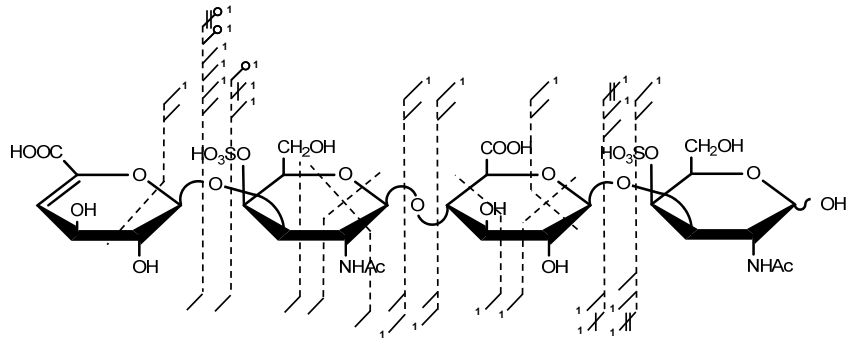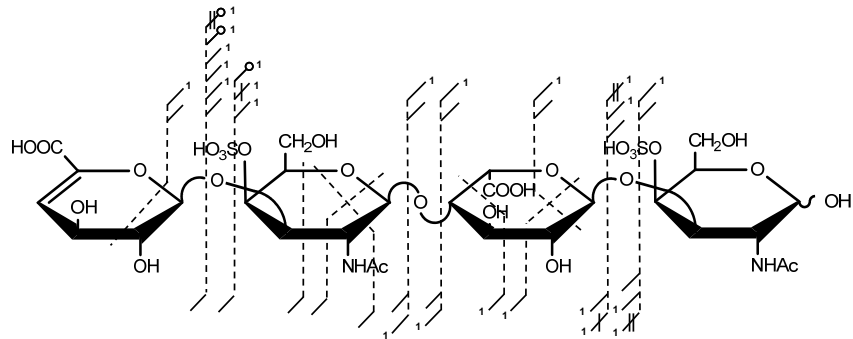

S6.

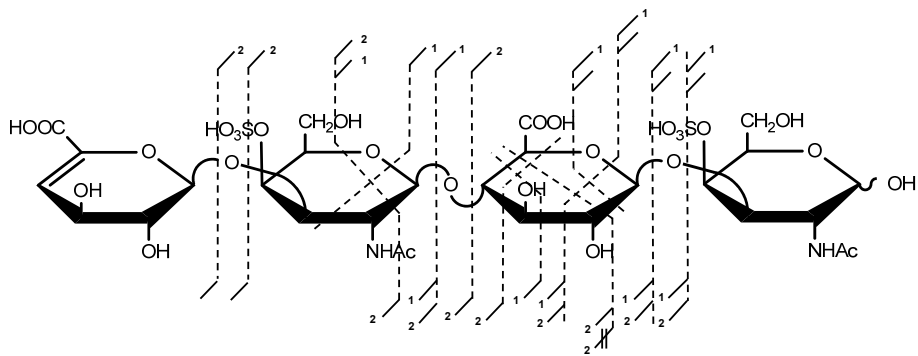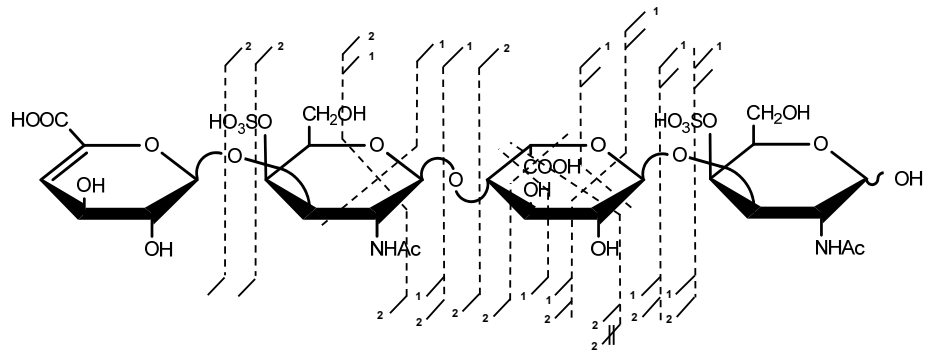

Supplement: NIHMS535971-supplement-Supplementary_figures.pdf [file NIHMS535971-supplement-Supplementary_figures.pdf]
